# Supplementary material for: Integration failure of regenerated limb tissue is associated with incongruencies in positional information in the Mexican axolotl
Source: Front Cell Dev Biol. 2023 Jun 2;11:1152510. doi: 10.3389/fcell.2023.1152510 (PMC10272535; doi:10.3389/fcell.2023.1152510)
Supplement: Supplementary file 1 [file Table1.XLSX]

## Sheet: Supplimental table
	Supplemental Table - Potential RARE Binding Motifs
			Upstream Region			5'UTR Exon			Intron Regions			3'UTR Exon
	Gene	Contig	RARE Type	Sequence	Most Similar Known Sequence	RARE Type	Sequence	Most Similar Known Sequence	RARE Type	Sequence	Most Similar Known Sequence	RARE Type	Sequence	Most Similar Known Sequence
	Chrdl1	CHRDL1-AMEX60DD201037123.1	1DR	GGGGCT T AGGCCA	GGGGCA A AAGTCA	None Present			Region too large to align			5DR	AATGTT TTATC AAAAAA	GGTGTT TTATA AGAACA
			1DR	TATTCT T AGGCCA	TGTTCA T TGGTCA							1DR	GGTTCA T TGCTCT	TGTTCA T TGGTCA
												1DR	TGTTGA C TGAGTT	TGTTCA C GGTGTT
	FGF8	FGF8-AMEX60DD301052891.1	2DR	GTTTCC TG AGGACT	GGTTCA AG AGAACA	1DR	AGGCCA C TGGCAG	AGGACA A TGGCCA	1DR	AGAACA G TGG (AAA)	AGGACA A TGGCCA	5DR	GGACTT TTAGA AGAACA	GGTGTT TTATA AGAACA
						1DR	GGGTTA A AAGGCA	GGGGCA A AAGTCA	1DR	AGGTAA C TGTTCA	AGGTAA C TGTTCA	5DR	TGTACA AAGAC TTTTCA	AGAACA GAAAC CATTCA
						5DR	AGAAAA GCGAA CTTTCA	AGAACA GAAAC CATTCA	1DR	TGGGCA C CGTGTT	TGTTCA C GGTGTT	1DR	GGACCA A AAGTGC	GGGGCA A AAGTCA
						5DR	GCGGTT TATGC AGAACA	GGTGTT TTATA AGAACA	2DR	GTTTCA AA AGACGA	GGTTCA AG AGAACA	5DR	AGGGGG TAGTT TGGGAA	AGGTGA TGGAT TGGACA
									1DR	CATTAA A GGGC (CT)	CATtCA A GGGgCa	5DR	GGTTAC TACTA AGCAGA	GGTTCA CGCAG AGGACA
									1DR	TTTTCA A TGGTAA	TGTTCA T TGGTCA	1DR	CATACA A GGTGCC	CATtCA A GGGgCa
									5DR	GGTTAA TGCTA AGGACA	GGTTCA CGCAG AGGACA
									5DR	AGAAAA GAAGA ATTTCA	AGAACA GAAAC CATTCA
									5DR	TGCCAA CCTCC CGCCCT	TGGCCA CCTGC ACCCCT
	BMP2	BMP-2[nr]BMP2[hs]-AMEX60DD301035718.1	2DR	GATTTA CA AAAAGA	GGTTCA AG AGAACA	1DR	CCTTTA A GAGGCA	CATtCA A GGGgCa	1DR	GTGGCC C AAGTGA	GGGGCA A AAGTCA	No 3'UTR Exon
			1DR	TCGGCA A TAGACA	GGGGCA A AAGTCA	1DR	TCTTGA T TGGACG	TGTTCA T TGGTCA	1DR	TGTACC C GCTGTT	TGTTCA C GGTGTT
			1DR	AGTGCA A TTCCCA	AGGACA A TGGCCA	1DR	GGTTGA C GATGGT	TGTTCA C GGTGTT	5DR	TGGGCA CCCCC GCCC (CC)	TGGCCA CCTGC ACCCCT
			1DR	CACTCT T GGGGCA	CATtCA A GGGgCa	5DR	GGAAAA GAAAA CAAACA	AGAACA GAAAC CATTCA	5DR	GTTGTT GTTTA AGAGCA	GGTGTT TTATA AGAACA
			1DR	AGATAA C TGTTCC	AGGTAA C TGTTCA				1DR	AGGACA T TGGCCA	AGGACA A TGGCCA
									5DR	CTAACA GACCC CGCTCA	AGAACA GAAAC CATTCA
									1DR	TGTTTG T TGGTCG	TGTTCA T TGGTCA
	Tbx5	TBX5-AMEX60DD102001050.6	1DR	GGGGCA T CAGT (CG)	GGGGCA A AAGTCA	5DR	GATCTT TGAAG AGAACT	GGTGTT TTATA AGAACA	Region too large to align			5DR	GTTTAA CTGAA AGGAAA	GGTTCA CGCAG AGGACA
			1DR	AGGTAA G TGAACA	AGGTAA C TGTTCA	1DR	TGTATA T CGGGCA	TGTTCA T TGGTCA				1DR	TTTTCA T TGGTGT	TGTTCA T TGGTCA
			1DR	TGTCCG C GGTGTC	TGTTCA C GGTGTT	1DR	GTGGCA G AAATCG	GGGGCA A AAGTCA				1DR*	TGTTAA C AATGTT	TGTTCA C GGTGTT
						1DR	TATTTA C GGGGAA	CATtCA A GGGgCa				5DR*	AATGTT TAAAA ATAAAA	GGTGTT TTATA AGAACA
												2DR*	GTTTAA AA ATAAAA	GGTTCA AG AGAACA
	HoxA9	HOXA9-AMEX60DD201021947.13	1DR	AGTTTA T GGGCCA	TGTTCA T TGGTCA	5DR*	TGTGTT TTATG TGTACA	GGTGTT TTATA AGAACA	1DR*	AGGCCA T TCTTCA	AGGTAA C TGTTCA	5DR	AAAAAA CTACC TTTTCA	AGAACA GAAAC CATTCA
			1DR*	GGGTCT A AAGCAA	GGGGCA A AAGTCA	2DR*	GTTTTA TG TGTACA	GGTTCA AG AGAACA	5DR*	AGGGGA GGGGG TGGAAA	AGGTGA TGGAT TGGACA	1DR	TGTTCA G TGTTTT	TGTTCA C GGTGTT
			5DR*	AGAAAC ATCAT CATTAA	AGAACA GAAAC CATTCA	5DR	AGCACG AGTGC TATTCC	AGAACA GAAAC CATTCA	5DR*	GGTGGA AAATA AAAACA	GGTGTT TTATA AGAACA	1DR	TGGACA G TGGCTA	AGGACA A TGGCCA
						1DR	TTTTTA T GGCTCA	TGTTCA T TGGTCA	5DR*	AAAACA AAAAC CCTACA	AGAACA GAAAC CATTCA	1DR	(T) ATTAA A CGGACA	CATtCA A GGGgCa
						1DR	CGGGCG C CAATCA	GGGGCA A AAGTCA	1DR	TGTTTA G CATGTT	TGTTCA C GGTGTT	1DR	TGTTCT A TGGTAC	TGTTCA T TGGTCA
						1DR	AGGTGA C TGTACT	AGGTAA C TGTTCA
	HoxA11	HOXA11[nr]HOXC11[hs]-AMEX60DD301021947.24	1DR	TGGACG T TGGCCG	AGGACA A TGGCCA	No 5'UTR Exon			2DR	GGCACA AG ATAACA	GGTTCA AG AGAACA	2DR	GCTTAA AG AGTGCA	GGTTCA AG AGAACA
			5DR	ATGACA CAATA CAATGA	AGAACA GAAAC CATTCA				1DR	CATTCC A CGGGCA	CATtCA A GGGgCa	5DR	GCTGCA GCCAG AGGACT	GGTTCA CGCAG AGGACA
			5DR	AGGTTT GTGGCA TGCACA	AGGTGA TGGAT TGGACA				1DR	AACTAA C TGTGCA	AGGTAA C TGTTCA	1DR	AGGACA C CGGGCA	AGGACA A TGGCCA
									5DR	GTTTCA CTCAT AGGCCA	GGTTCA CGCAG AGGACA	5DR	GGAACA GCACG GATTGA	AGAACA GAAAC CATTCA
												1DR	TCTTTA C GGTGT (G)	TGTTCA C GGTGTT
												1DR	AGGTCA C GGTTAC	AGGTAA C TGTTCA
	HoxC5	HOXC5-AMEX60DD201029497.6	1DR	GGGACA C AACACA	GGGGCA A AAGTCA	1DR	TGTTGG C GGTTCT	TGTTCA C GGTGTT	1DR	TTTTTA T GGGCCA	TGTTCA T TGGTCA	5DR*	CGAAAC GTAGG TAATCA	AGAACA GAAAC CATTCA
			1DR	AGTTCA G GATGTG	TGTTCA C GGTGTT	1DR	TGTTTC T TGGTTG	TGTTCA T TGGTCA	2DR	GGTTCT TA GAAACA	GGTTCA AG AGAACA	1DR*	ACGTAG G TAATCA	AGGTAA C TGTTCA
			2DR	CGTTAA AA AAAACA	GGTTCA AG AGAACA	2DR	GGTTCA AA AGTCCA	GGTTCA AG AGAACA	1DR	AGGTGG C TTTTCT	AGGTAA C TGTTCA
						1DR	AGGCCA A TGTCCC	AGGACA A TGGCCA	1DR	TGTAGA C GCTATT	TGTTCA C GGTGTT
						1DR	AAGTAT C TGTGCA	AGGTAA C TGTTCA	1DR	TATCCA T GGGGCA	CATtCA A GGGgCa
						5DR	AGGTGA CGCTG TGGACT	AGGTGA TGGAT TGGACA
						1DR	GGGTCA C AAATCA	GGGGCA A AAGTCA
	* means that the sequences overlap
